# Supplementary material for: Differences in the fungal communities nursed by two genetic groups of the alpine cushion plant, Silene acaulis
Source: PubMed Central journal article supplement (PMC6303776; doi:10.1002/ece3.4606), 2018-11-21

Bray\_Curtis fungal dissimilarities, 3D-NMDS

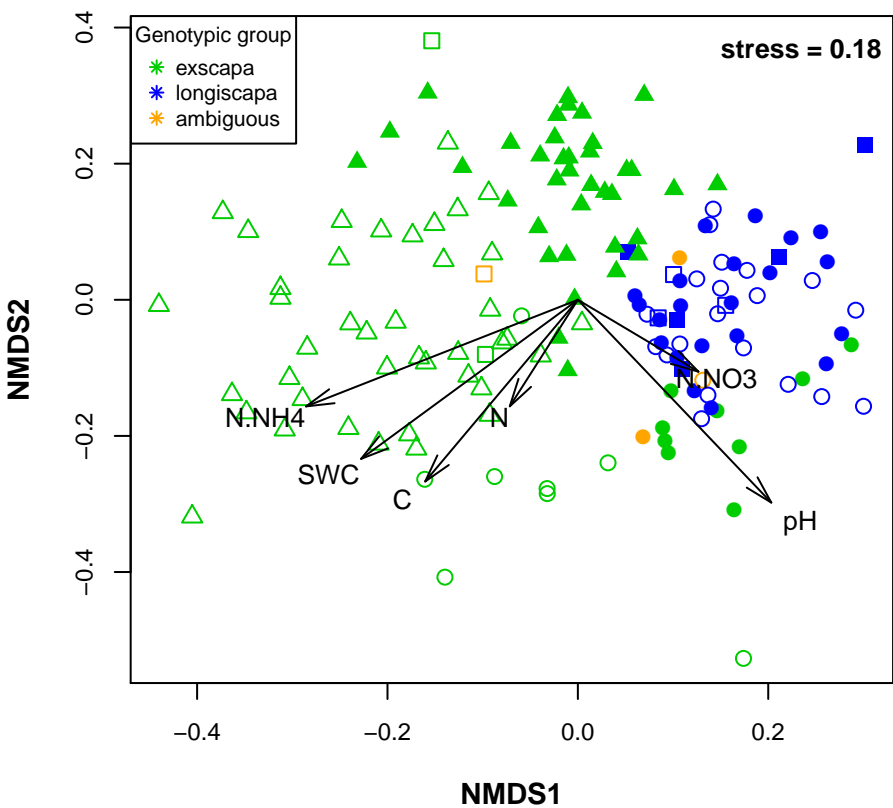

Bray\_Curtis fungal dissimilarities, 2D-NMDS

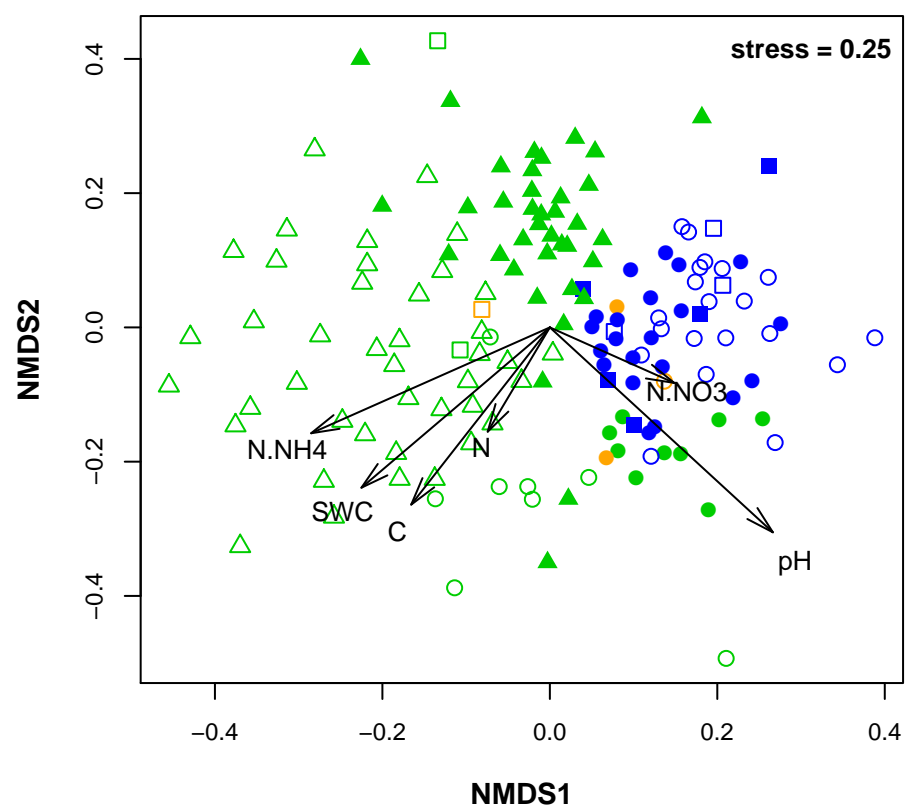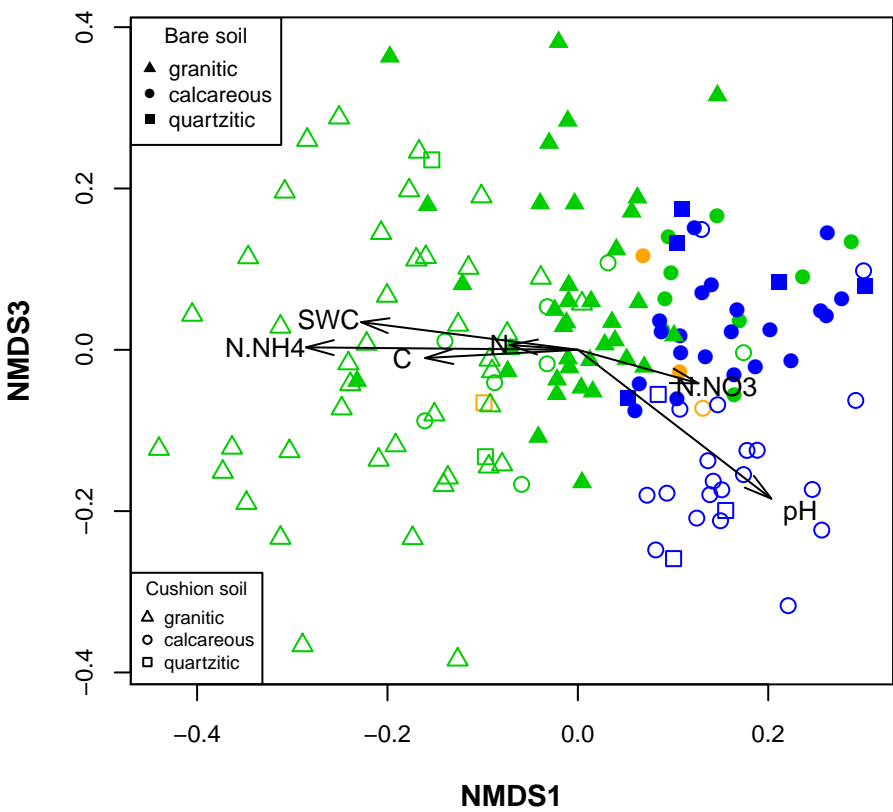

Supplement: ECE3-8-11568-s002.pdf [file ECE3-8-11568-s002.pdf]
